# Supplementary material for: PIKfyve, expressed by CD11c-positive cells, controls tumor immunity
Source: PubMed Central journal article supplement (PMC11213953; doi:10.1038/s41467-024-48931-9), 2024-06-28
Supplement: 41467_2024_48931_MOESM1_ESM.pdf [file 41467_2024_48931_MOESM1_ESM.pdf]

## **PIKfyve, expressed by CD11c-positive cells, controls tumor immunity**

Jae Eun Choi<sup>1,2,11</sup>, Yuanyuan Qiao<sup>1,2,3</sup>, Ilona Kryczek<sup>4,5</sup>, Jiali Yu<sup>4,5</sup>, Jonathan Gurkan<sup>1,2, 12</sup>, Yi Bao<sup>1,2</sup>, Mahnoor Gondal<sup>1,2,6</sup>, Jean Ching-Yi Tien<sup>1,2</sup>, Tomasz Maj<sup>4,5</sup>, Sahr Yazdani<sup>1,2, 13</sup>, Abhijit Parolia<sup>1,2</sup>, Houjun Xia<sup>4,5</sup>, JiaJia Zhou<sup>4,5</sup>, Shuang Wei<sup>4,5</sup>, Sara Grove<sup>4,5</sup>, Linda Vatan<sup>4,5</sup>, Heng Lin<sup>4,5</sup>, Gaopeng Li<sup>4,5</sup>, Yang Zheng<sup>1,2</sup>, Yuping Zhang<sup>1,2</sup>, Xuhong Cao<sup>1,2,7</sup>, Fengyun Su<sup>1,2</sup>, Rui Wang<sup>1,2</sup>, Tongchen He<sup>1,2</sup>, Marcin Cieslik<sup>1,2,6</sup>, Michael D. Green<sup>5,8,9</sup>, Weiping Zou<sup>1,2,3,4,5\*</sup>, and Arul M. Chinnaiyan<sup>1,2,3,7,10\*</sup>

<sup>1</sup>Department of Pathology, University of Michigan, Ann Arbor, MI, USA

<sup>2</sup>Michigan Center for Translational Pathology, University of Michigan, Ann Arbor, MI, USA

<sup>3</sup>Rogel Cancer Center, University of Michigan, Ann Arbor, MI, USA

<sup>4</sup>Department of Surgery, University of Michigan, Ann Arbor, MI, USA

<sup>5</sup>Center of Excellence for Cancer Immunology and Immunotherapy, University of Michigan, Ann Arbor, MI, USA

<sup>6</sup>Department of Computational Medicine & Bioinformatics, University of Michigan, Ann Arbor, MI, USA

<sup>7</sup>Howard Hughes Medical Institute, University of Michigan, Ann Arbor, MI, USA

<sup>8</sup>Department of Radiation Oncology, University of Michigan, Ann Arbor, MI, USA

<sup>9</sup>Department of Radiation Oncology Veterans Affairs Ann Arbor Healthcare System, Ann Arbor, MI, USA

<sup>10</sup>Department of Urology, University of Michigan, Ann Arbor, MI, USA

<sup>11</sup>Present address: Department of Pediatrics, University of California, San Francisco, CA, USA

<sup>12</sup>Present address: Feinberg School of Medicine, Northwestern University, Chicago, IL, USA

<sup>13</sup>Present address: Department of Pediatrics, Children's Hospital of Philadelphia, PA, USA

\*Jointly corresponding authors:

Arul M. Chinnaiyan, M.D., Ph.D.

Email: [arul@umich.edu](mailto:arul@umich.edu)

Weiping Zou, M.D., Ph.D.

Email: [wzou@umich.edu](mailto:wzou@umich.edu)

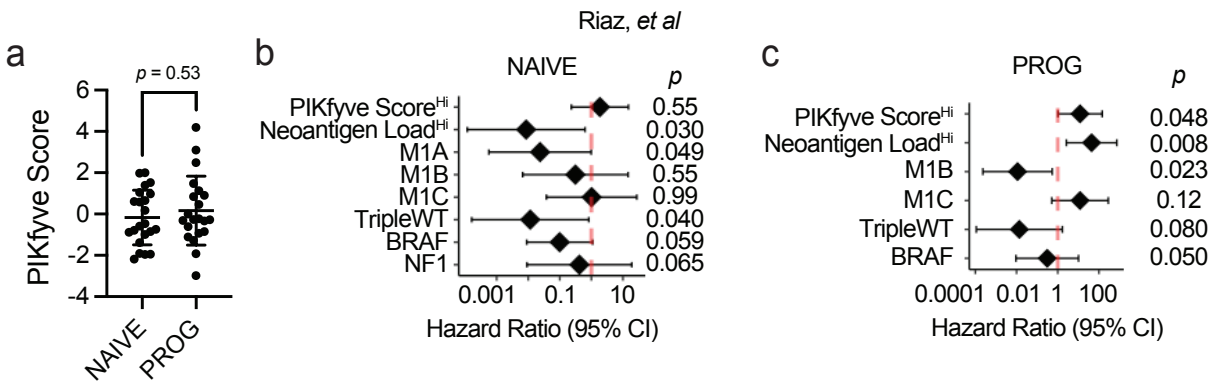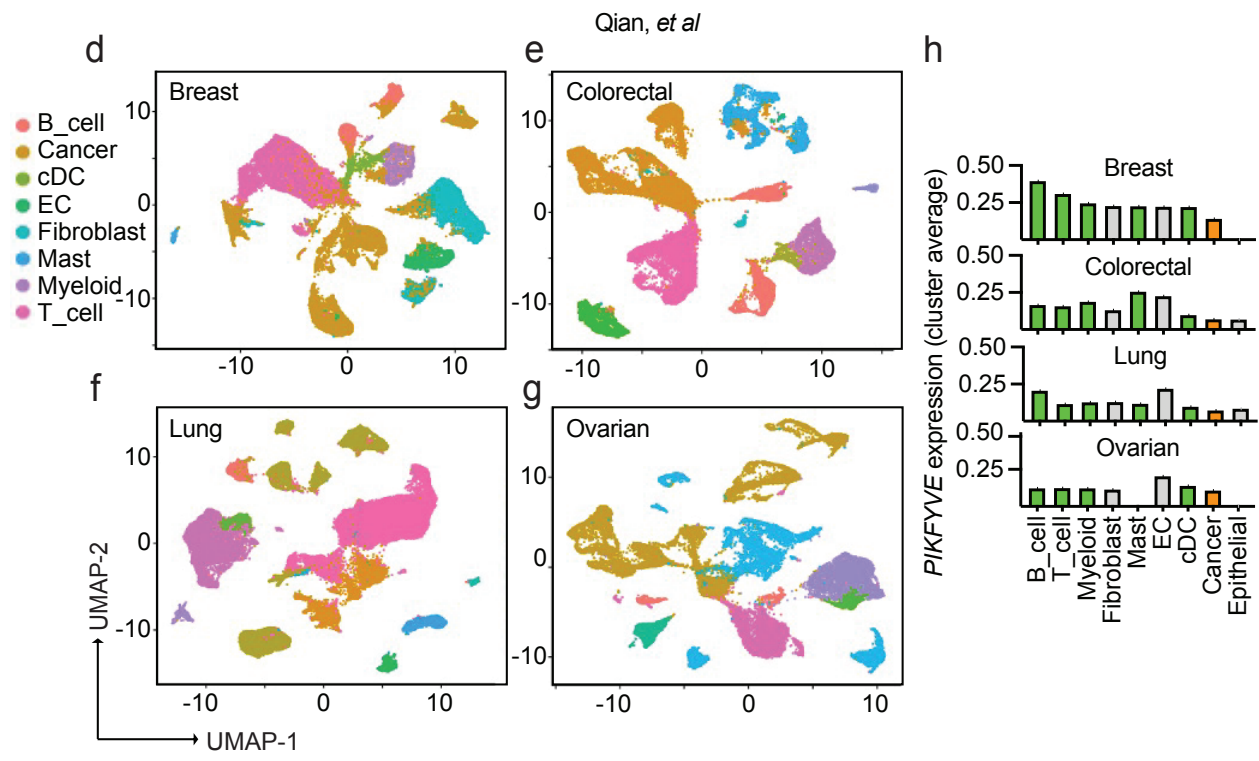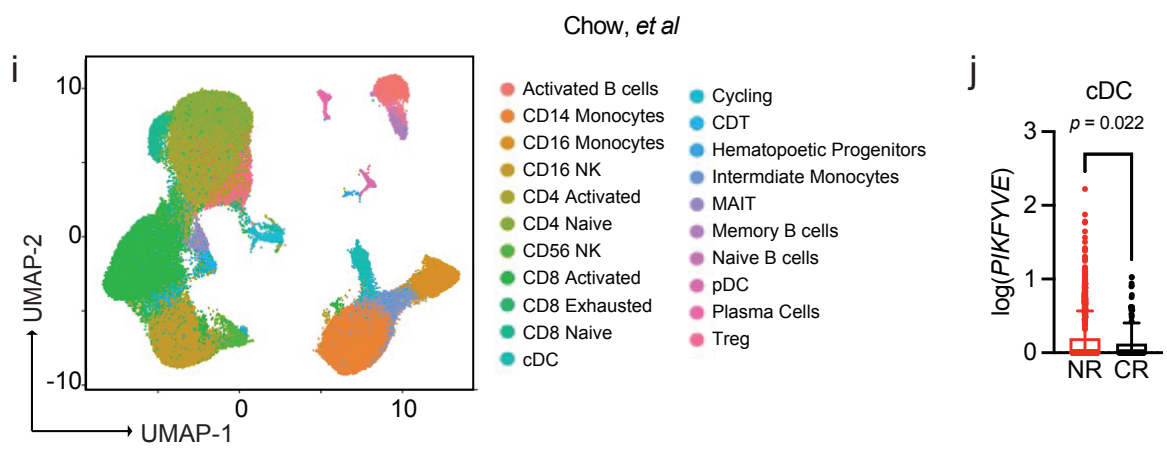

**Supplementary Information 1. Characterization of *PIKFYVE* and *PIKfyve* score expression in cancer patient tumors.** **a)** Comparison of *PIKfyve* scores in patients with melanoma who were ICB treatment-naïve (“NAÏVE”) versus those who had previously progressed on ICB treatment (“PROG”). Data plotted are mean  $\pm$  s.d. from bulk RNA-seq data.<sup>44</sup> *P* value is determined by Mann Whitney U test. **b)** Forest plot of hazard ratios of NAÏVE cohort by high versus low *PIKfyve* score, high versus low neoantigen load, disease stage (reference is M0), and mutation subtype (reference is None). Data plotted are hazard ratios with 95% confidence intervals from bulk RNA-seq data.<sup>44</sup> *P* values are determined by a multivariate cox proportional hazards model. **c)** Forest plot of hazard ratios of PROG cohort by high versus low *PIKfyve* score, high versus low neoantigen load, disease stage (reference is M1A), and mutation subtype (reference is None). Data plotted are hazard ratios with 95% confidence intervals from bulk RNA-seq data.<sup>44</sup> *P* values are determined by a multivariate cox proportional hazards model. T-SNE plots of immune cells in pre-treatment tumors from patients with **(d)** breast, **(e)** colorectal, **(f)** lung or **(g)** ovarian cancer from scRNA-seq data.<sup>48</sup> **h)** Barplots of *PIKFYVE* cluster average expression by cancer, stroma, or immune cell type from scRNA-seq data.<sup>48</sup> **i)** T-SNE plot of immune cells in pre-treatment tumors from patients with endometrial cancer from scRNA-seq data.<sup>50</sup> **j)** Comparison of log (*PIKFYVE*) expression in individual cDCs in patients with endometrial cancer who were nonresponders (“NR” including SD and PD) versus CR to ICB treatment. Data plotted are mean  $\pm$  s.d. of all individual cDCs from scRNA-seq data.<sup>50</sup> *P* value is determined by student t-test with Welch’s correction. All *P* values are two-sided. Source data are provided in Supplementary Data 9.

a

Gating strategy for Supp 2b-g

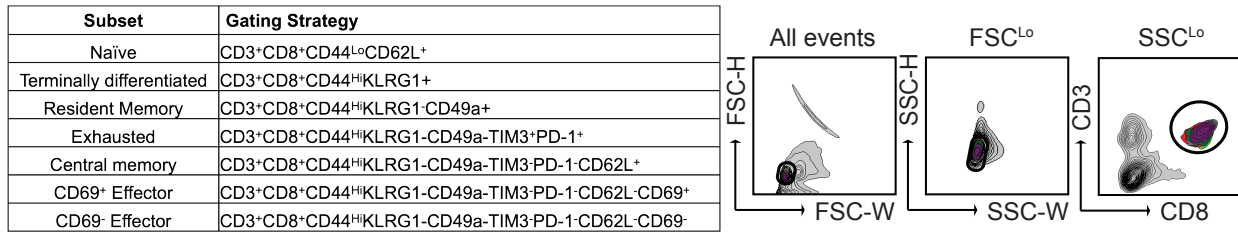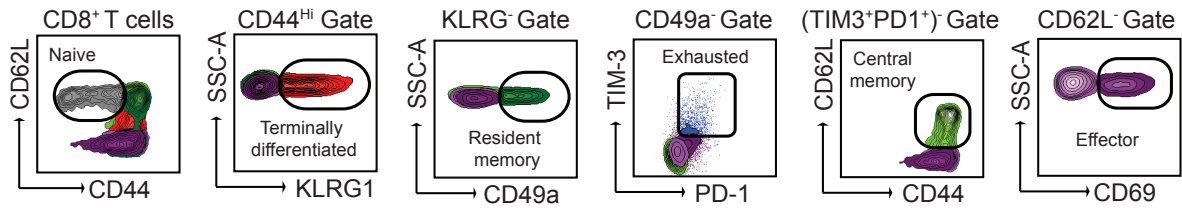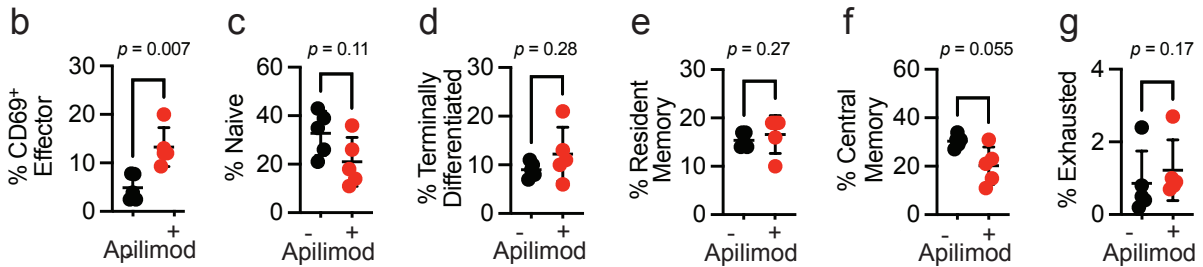

h

Gating strategy for Fig.2a-b, Supp 2i-l

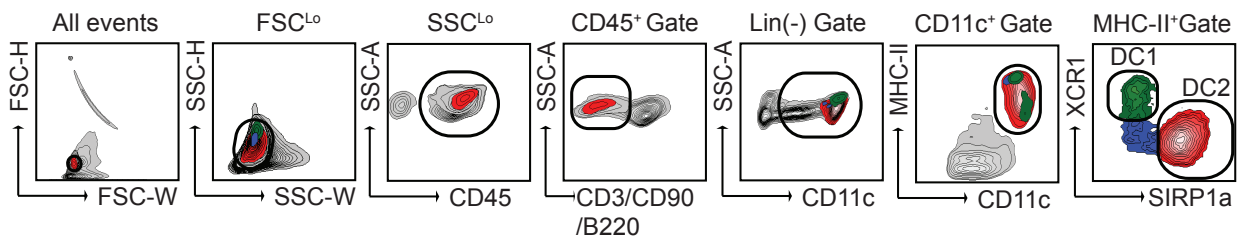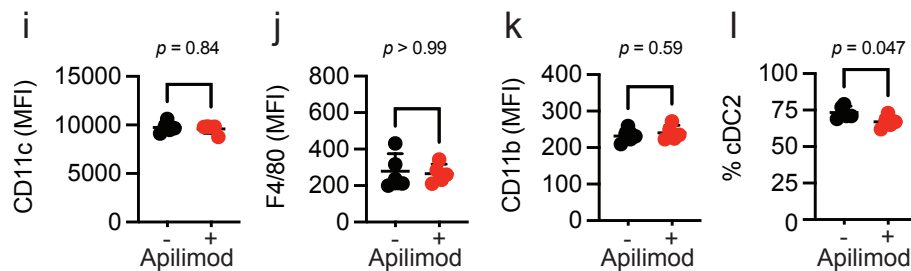

**Supplementary Information 2: Characterization of T cell and myeloid subsets of PIKfyve inhibitor-treated splenic immune cells.** a) Gating strategy for Supp. 2 panels b-g for CD8<sup>+</sup> T cells. Comparison of the percentage of (b) CD69<sup>+</sup> effector, (c) naïve, (d)

terminally differentiated, **(e)** resident memory, **(f)** central memory, and **(g)** exhausted CD8<sup>+</sup> T cells from spleens of non-tumor-bearing mice treated with vehicle or apilimod (30 mg/kg daily) on day 5 of treatment ( $n = 5$  spleens per group). Data plotted are mean  $\pm$  s.d.  $P$  values are determined from student t-test. **(h)** Gating strategy for Figure 2 panels a-b and Supp. 2 panels i-l for myeloid cells and cDCs. Comparison of the percentage of total **(i)** CD11c, **(j)** F4/80, and **(k)** CD11b in CD45<sup>+</sup> cells and **(l)** percentage of cDC2 cells from spleens of non-tumor-bearing mice treated with vehicle or apilimod (30 mg/kg daily) on day 5 of treatment ( $n = 5$  per group). Data plotted are mean  $\pm$  s.d.  $P$  values are determined from student t-test. All  $P$  values are two-sided without corrections for multiple comparisons. Source data are provided in Supplementary Data 9.

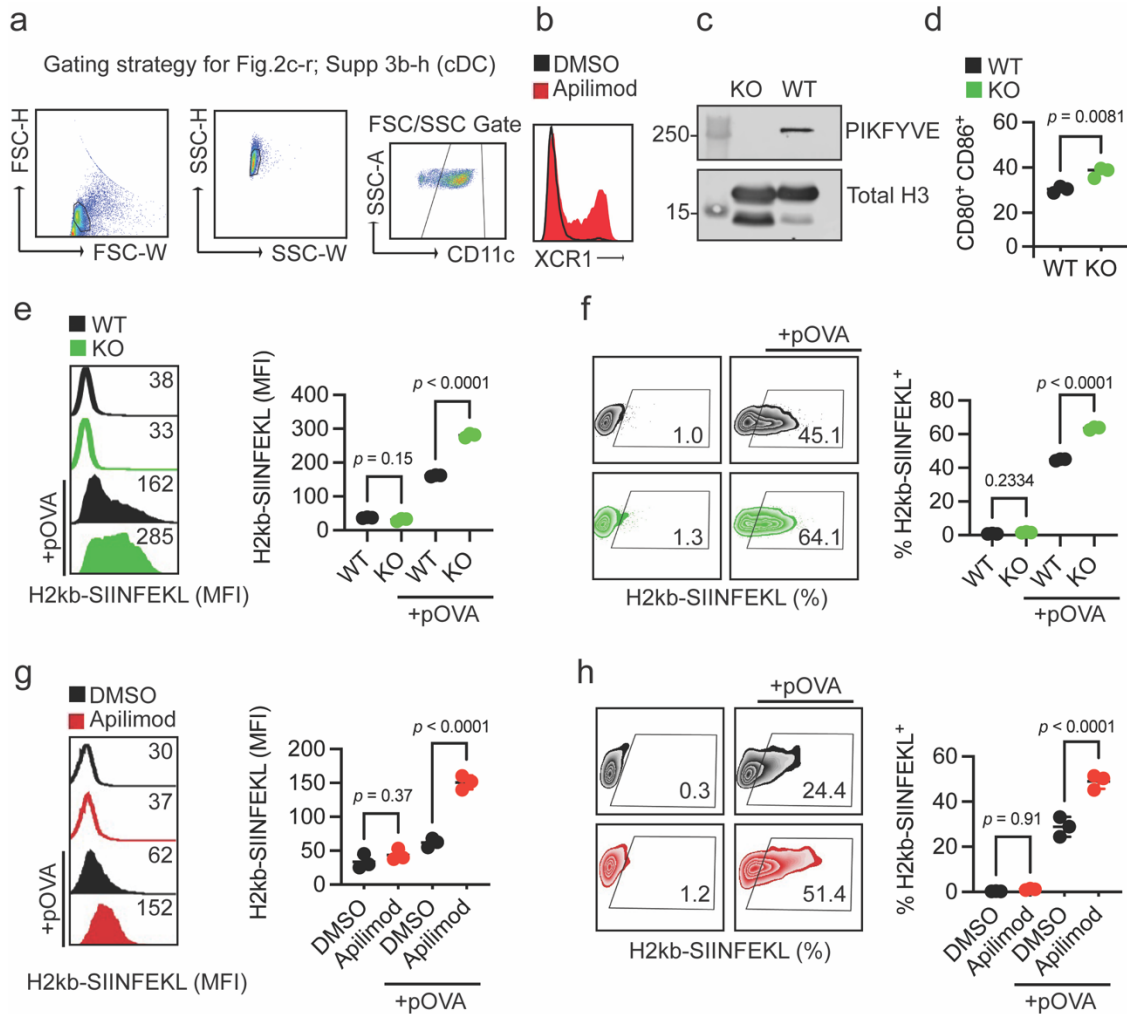

**Supplementary Information 3: PIKfyve expression CD11c<sup>+</sup> cells and antigen presentation.** **a)** Gating strategy for Figure 2 panels c-r and Supp. panels b-h (CD11c<sup>+</sup> gate). **b)** Representative density plot of median fluorescent intensity of surface XCR1 in DMSO or apilimod-treated cDCs after 20 hours on culture day 6. **c)** Immunoblots of PIKfyve in *Pikfyve* WT vs. KO cDC lysates on culture day 9. Total histone H3 serves as loading control. Image is representative of two experiments. **d)** Comparison of the percentage of CD80<sup>+</sup>CD86<sup>+</sup> cDCs in *Pikfyve* WT vs KO models. Data plotted are mean  $\pm$  s.d. *P* values are determined from student t-tests across 3 biological replicates. Relative median fluorescent intensity of surface H-2kb-SIINFEKL (**e**) and percent H-2kb-SIINFEKL<sup>+</sup> cells (**f**) in *Pikfyve* WT vs. KO cDC +/- pOVA (100 ng/ml) after 12 hours on culture day 9. Data plotted are mean  $\pm$  s.d. *P* value is determined by student t-test across 3 biological replicates. Representative plots are shown. Relative median fluorescent intensity of surface H-2kb-SIINFEKL (**g**) and percent H2kb-SIINFEKL<sup>+</sup> cells (**h**) in DMSO or apilimod-treated cDCs +/- pOVA (100 ng/ml) after 12 hours. Data plotted are mean  $\pm$  s.d. *P* value is determined by student t-test across 3 biological replicates. Representative plots are shown. All *P* values are two-sided. Source data are provided in Supplementary Data 9. Source data for immunoblot in Supp 3c provided in Supplementary Information 11.

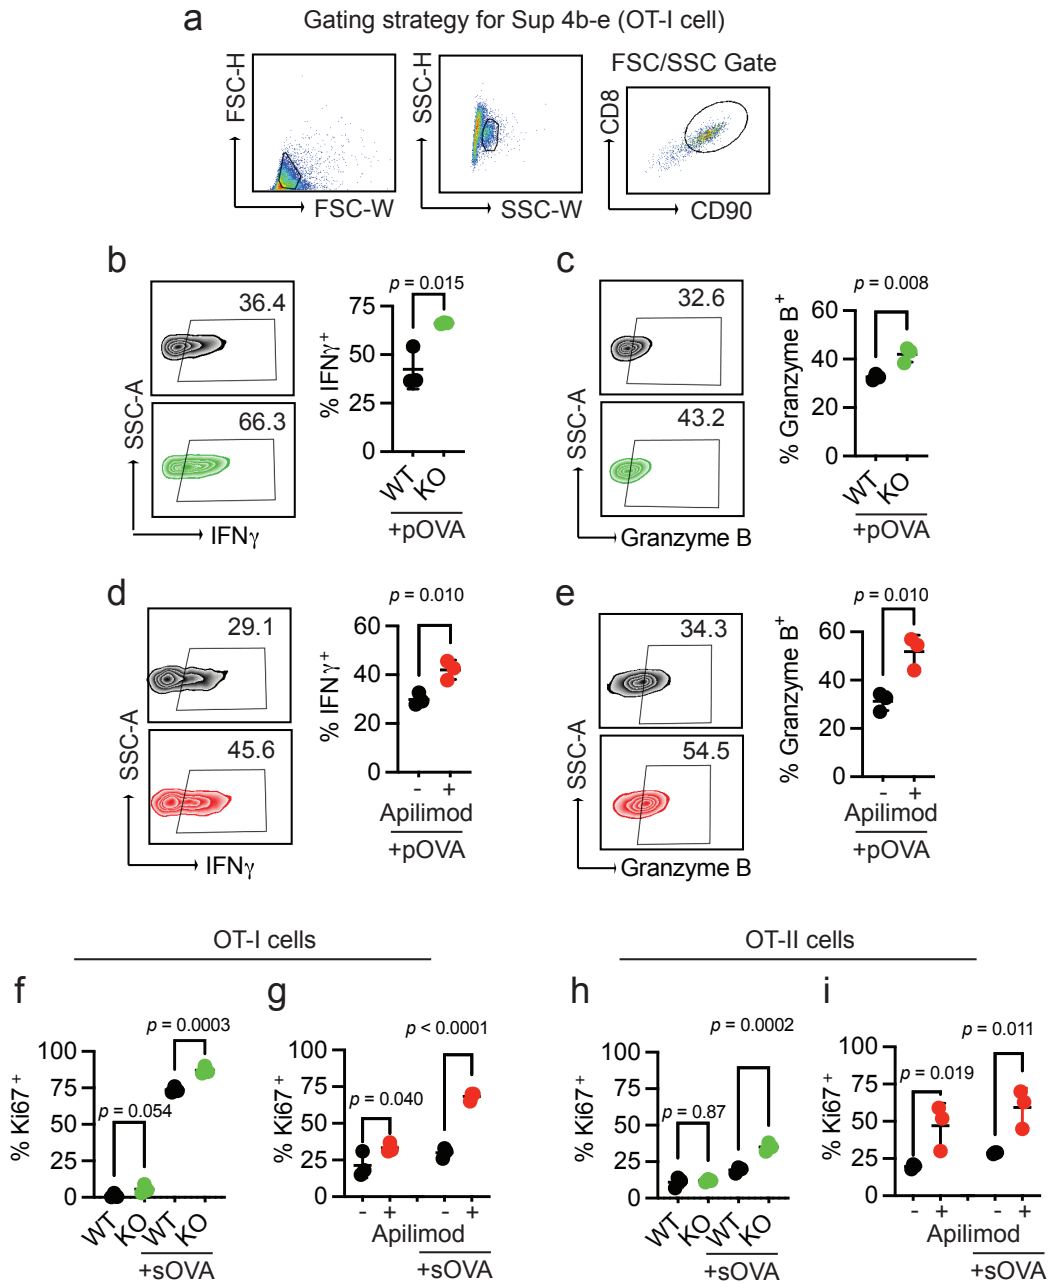

**Supplementary Information 4. PIKfyve expression in CD11c<sup>+</sup> cells and OT-I and OT-II T cell activation.** **a**) Gating strategy for Supp. 4b-e (CD90<sup>+</sup> CD8<sup>+</sup> gate for OT-I cells). Representative dot plots and percentages of **(b)** IFN $\gamma$ <sup>+</sup> and **(c)** granzyme B<sup>+</sup> OT-I cells after 48 hours of co-culture with *Pikfyve* WT vs. KO cDCs +/- pOVA 100ng/ml. *n* = 3 biological replicates. Data plotted are mean  $\pm$  s.d. *P* value is determined by student t-test. Representative dot plot and percentage of **(d)** IFN $\gamma$ <sup>+</sup> and **(e)** granzyme B<sup>+</sup> OT-I cells after 48 hours of co-culture with DMSO or apilimod pre-treated cDCs +/- pOVA 100 ng/ml. *n* = 3 biological replicates. Data plotted are mean  $\pm$  s.d. *P* value is determined by student t-test. Percentage of Ki67<sup>+</sup> OT-I cells after 72 hours of co-culture with **(f)** *Pikfyve*

WT versus KO pre-treated cDCs +/- sOVA (10 µg/ml) or **(g)** DMSO or apilimod pre-treated cDCs +/- sOVA (10 µg/ml). Percentage of Ki67+ OT-II cells after 72 hours of co-culture with **(h)** *Pikfyve* WT versus KO pre-treated cDCs +/- sOVA or **(i)** DMSO or apilimod pre-treated cDCs +/- sOVA. n = 3 biological replicates. Data plotted are mean ± s.d. *P* value is determined by student t-test. All *P* values are two-sided. Source data are provided in Supplementary Data 9.



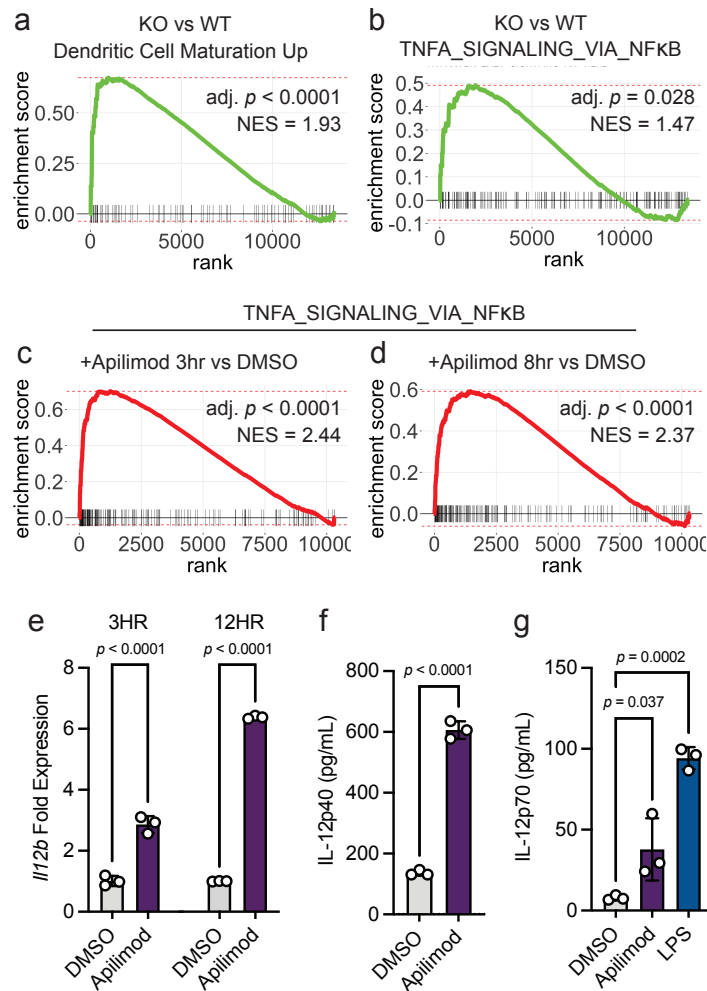

**Supplementary Information 5: PIKfyve expression in CD11c<sup>+</sup> cells and dendritic cell gene signatures and Il-12 expression.** **a**) Enrichment plot of Dendritic Cell Maturation Up gene signature (M4562: LENAOUR\_DENDRITIC\_CELL\_MATURATION\_UP) in *Pikfyve* KO versus WT cDCs on culture day 9. **b**) Enrichment plot of MSigDB Hallmark “TNF\_SIGNALING\_VIA\_NFκB” in *Pikfyve* KO versus WT cDCs on culture day 9. Enrichment plots of MSigDB Hallmark “TNF\_SIGNALING\_VIA\_NFκB” in apilimod versus DMSO-treated cDCs treated for **(c)** 3 hours or **(d)** 8 hours on culture day 6. **e**) Comparison of *Il12b* expression fold change by RT-qPCR in apilimod vs. DMSO-treated cDCs treated for 3 or 12 hours on culture day 6. Data plotted are mean ± s.d. *P* value is determined by ANOVA after post-hoc Tukey adjustment for multiple comparisons across 3 biological replicates. **f**) Comparison of IL-12p40 protein levels by ELISA in media from apilimod versus DMSO-treated cDCs treated for 12 hours on culture day 6. Data plotted are mean ± s.d. *P* values are generated from student t-test across 3 biological replicates. **g**) Comparison of IL-12p70 protein levels by ELISA in media from apilimod vs. DMSO-treated cDCs treated for 24 hours on culture day 6. Data plotted are mean ± s.d. *P* values are generated from student t-test across 3 biological replicates. All *P* values are two-sided. Source data are provided in Supplementary Data 9.

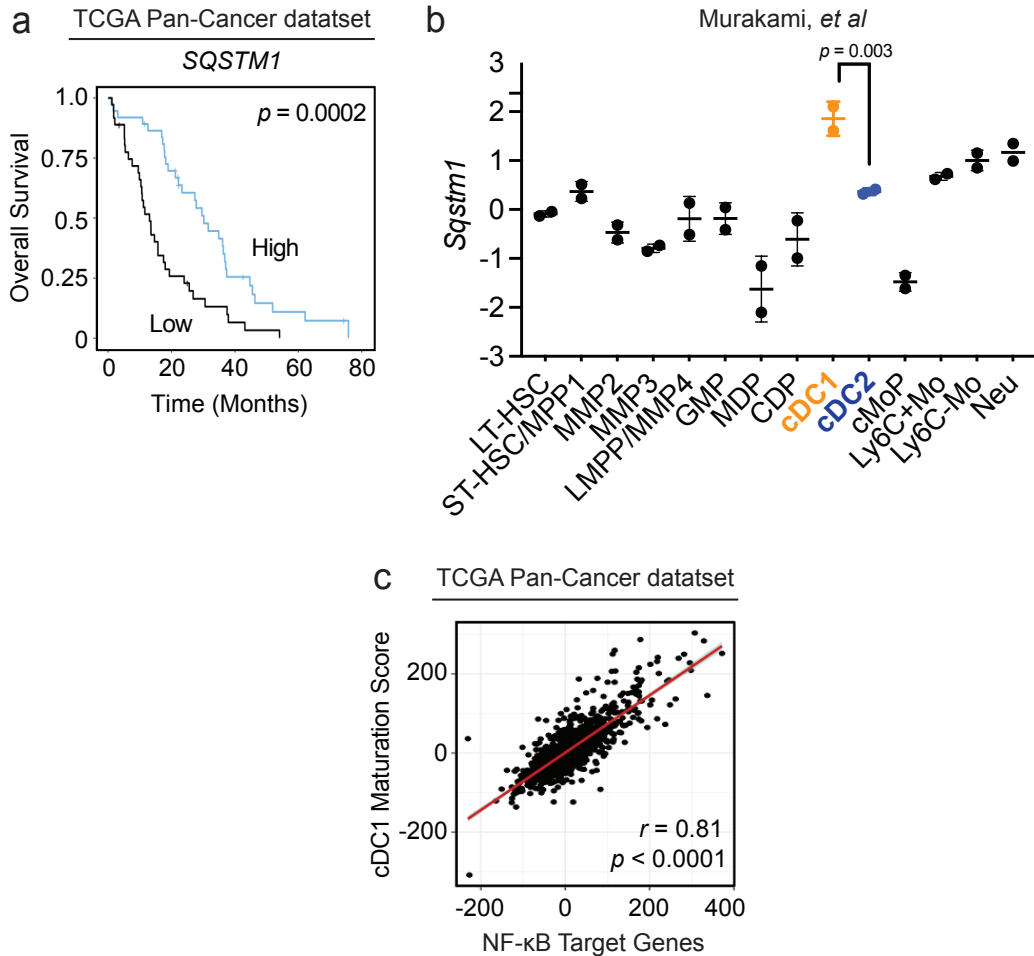

**Supplementary Information 6. Comparison of NF- $\kappa$ B target genes in cDC subsets.** **a)** Kaplan-Meier curve of overall survival of patients in the TCGA Pan-Cancer bulk RNA-seq dataset, by high or low (median) *SQSTM1* normalized gene expression. *P* value is determined by log-rank test. **b)** Comparison of *Sqstm1* normalized gene expression across myeloid lineage cell types. Data plotted are mean  $\pm$  s.d. from bulk RNA-seq data.<sup>81</sup> *P* value is determined by ANOVA after post-hoc comparisons across all pair-wise comparisons. *P* value for cDC1 versus cDC2 shown on plot. **c)** Correlation between cDC1 maturation score and NF- $\kappa$ B target genes expression in the TCGA Pan-Cancer bulk RNA-seq dataset. Correlation coefficient and *P* value are calculated using Pearson's product-moment correlation. All *P* values are two-sided. Source data are provided in Supplementary Data 9.

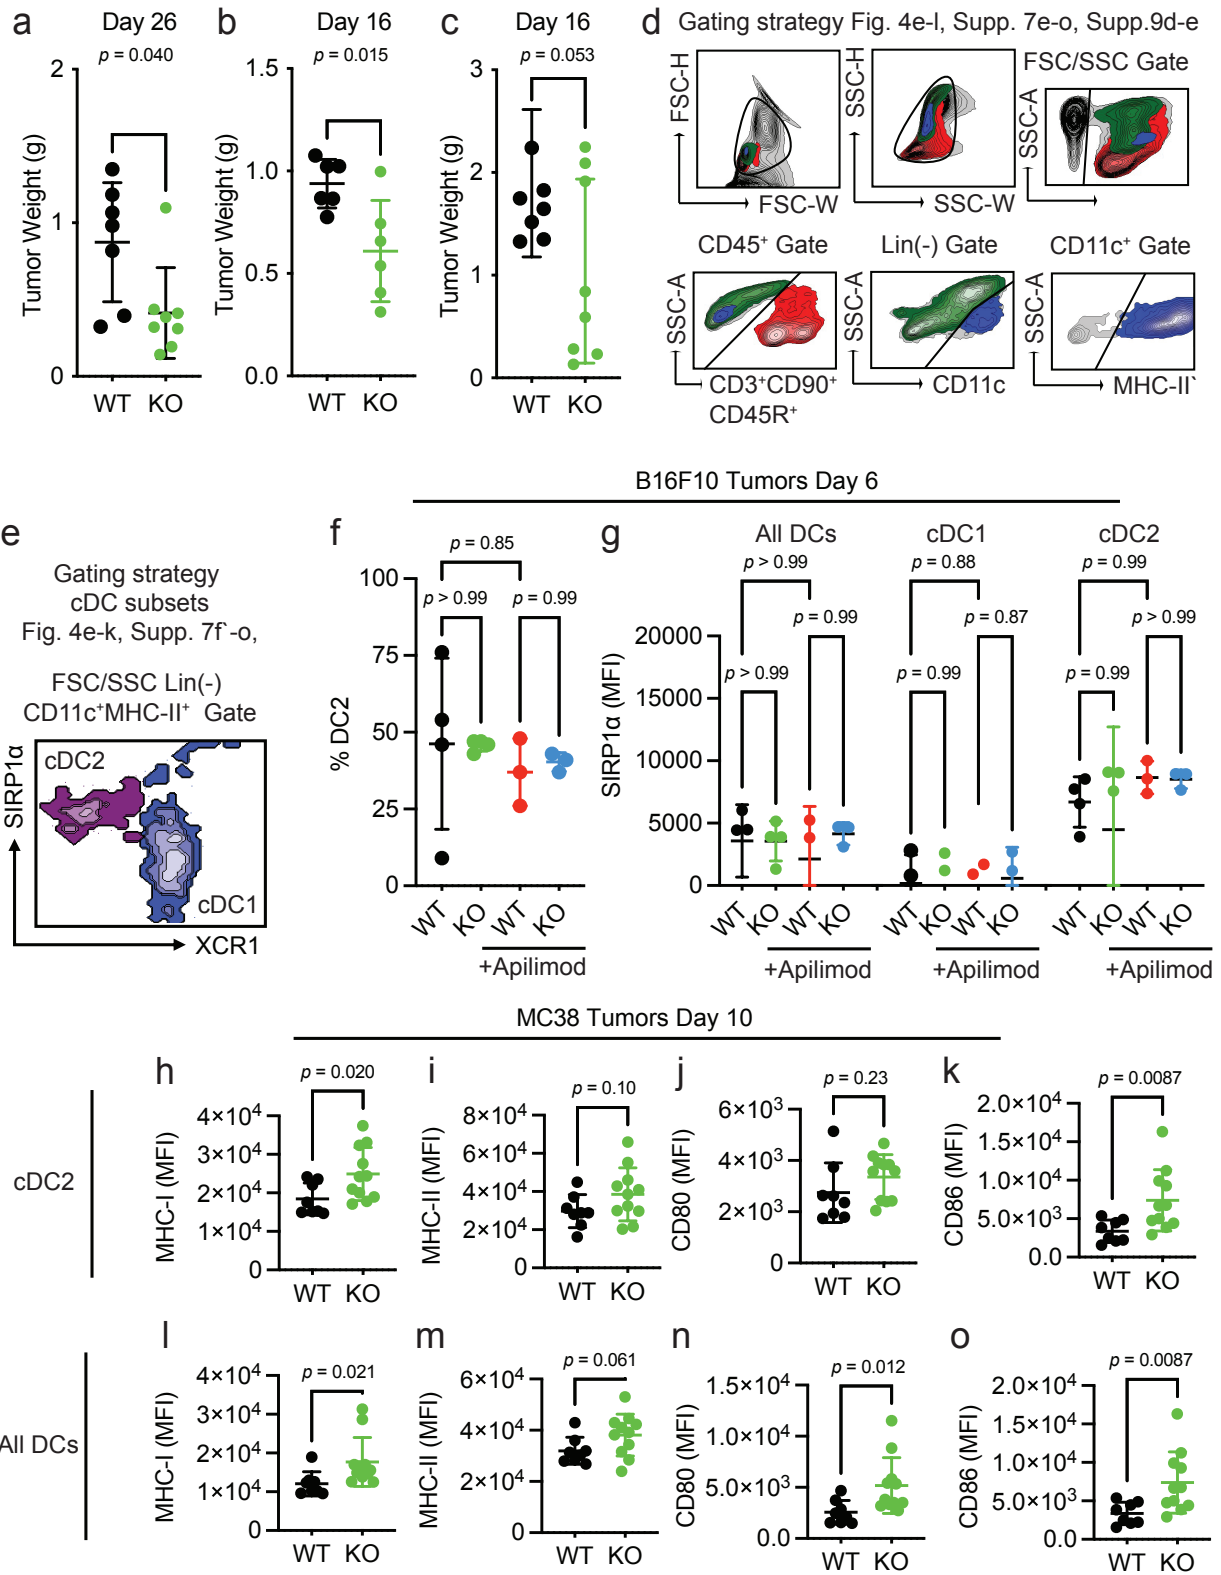

**Supplementary Information 7. Comparison of tumor-associated cDC subsets with genetic loss of *Pikfyve* in CD11c<sup>+</sup> cells. Tumor weights for (a) MC38 tumor measured**

on Day 26, **(b)** MCA-205 tumor measured on Day 16, and **(c)** B16F10 tumor measured on Day 16. Data plotted are mean  $\pm$  s.d. *P* values are determined by Mann-Whitney U test. **(d)** Gating strategy for Fig. 4e-l, Supp. 7e-o, Supp. 9d-e. CD45<sup>+</sup> Lin(-) CD11c<sup>+</sup> MHC-II<sup>+</sup> gate for dendritic cells from tumors and tumor-draining lymph nodes (TDLN). **(e)** Gating strategy for Fig. 4e-k, Supp. 7f-o. Additional cDC1 and cDC2 gates for dendritic cells from tumors. B16F10 tumor model. **(f)** % cDC2 of all DC cells and **(g)** SIRP1 $\alpha$  median fluorescent intensity by all DC, cDC1 or cDC2 subset in *Pikfyve* KO mice or WT mice treated with vehicle or apilimod (30 mg/kg daily). Bilateral subcutaneous tumors from each mouse (*n* = 4 per group) were combined for analysis. Data plotted are mean  $\pm$  s.d. *P* value is determined by ANOVA after post-hoc Tukey adjustment for multiple comparisons on day 6 of treatment. **(h)** MHC-I, **(i)** MHC-II, **(j)** CD80 and **(k)** CD86 median fluorescent intensity in the cDC2 subset and **(l)** MHC-I, **(m)** MHC-II, **(n)** CD80 and **(o)** CD86 median fluorescent intensity in all DCs in MC38 tumors of *Pikfyve* KO (*n* = 11) or WT mice (*n* = 8). Data plotted are mean  $\pm$  s.d. *P* value is determined by student t-test with Welch's correction on day 10. All *P* values are two-sided. Source data are provided in Supplementary Data 9.

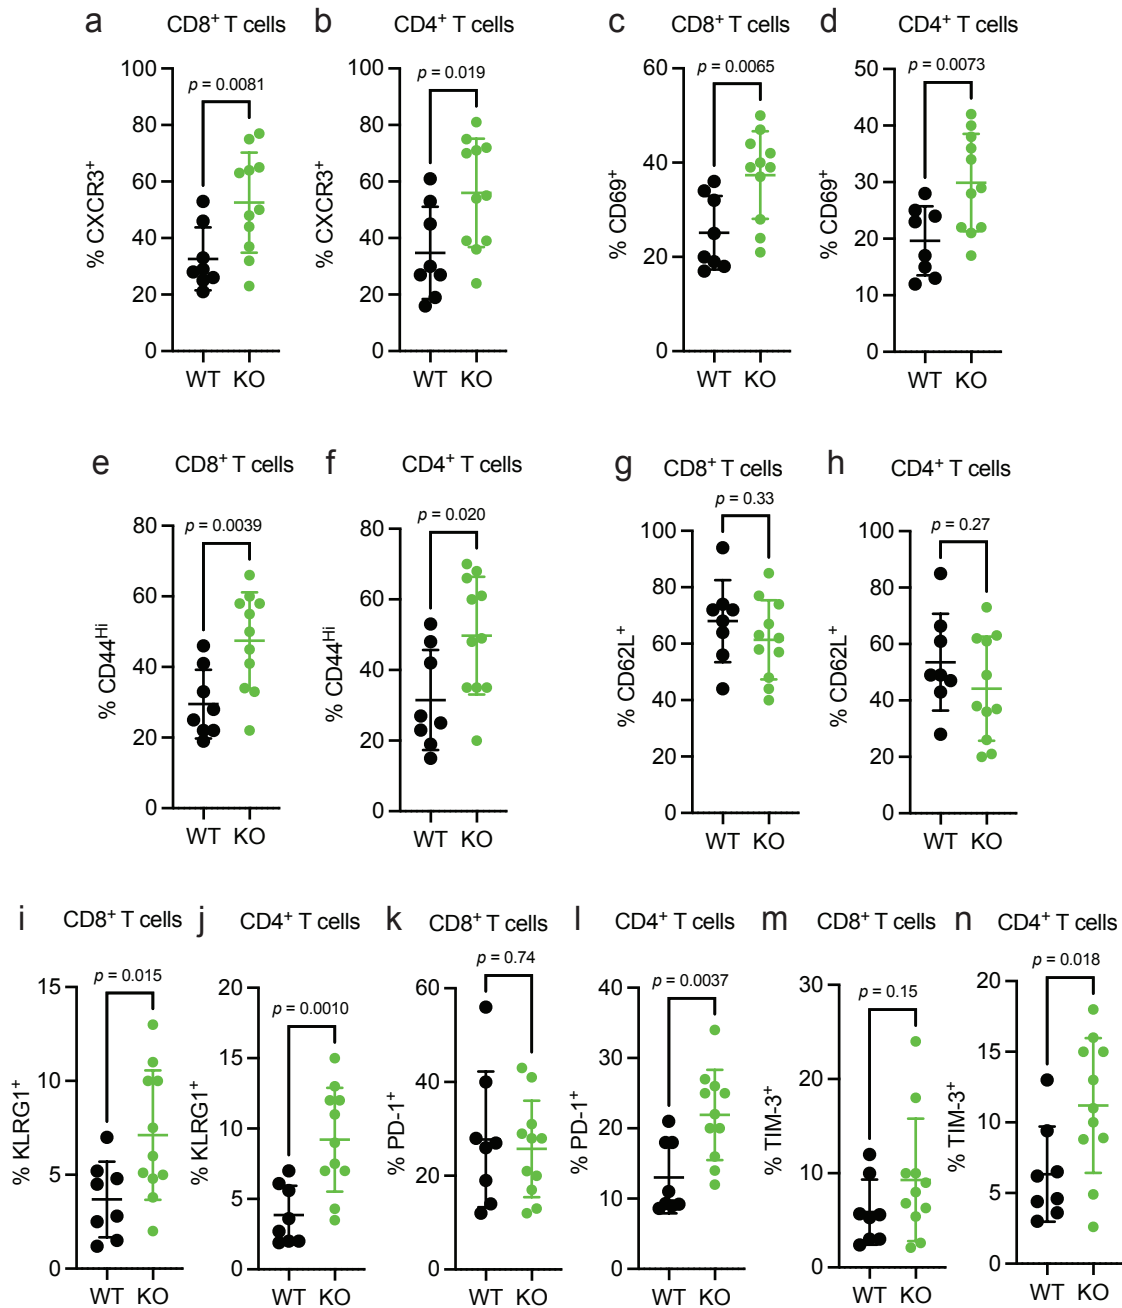

**Supplementary Information 8. Comparison of tumor-associated T cell subsets by expression of *Pikfyve* in CD11c<sup>+</sup> cells.** Comparison of the percentage of (a) CXCR3<sup>+</sup>, (c) CD69<sup>+</sup>, (e) CD44<sup>Hi</sup>, (g) CD62L<sup>+</sup>, (i) KLRG1<sup>+</sup>, (k) PD-1<sup>+</sup> and (m) TIM-3<sup>+</sup> CD8<sup>+</sup> T cells and (b) CXCR3<sup>+</sup>, (d) CD69<sup>+</sup>, (f) CD44<sup>Hi</sup>, (h) CD62L<sup>+</sup>, (j) KLRG1<sup>+</sup>, (l) PD-1<sup>+</sup> and (n) TIM-3<sup>+</sup> CD4<sup>+</sup> T cells. T cells isolated from MC38 tumors of *Pikfyve* KO ( $n = 11$ ) or WT mice ( $n = 8$ ). Data plotted are mean  $\pm$  s.d.  $P$  value is determined by student t-test with Welch's correction on day 10. All  $P$  values are two-sided without corrections for multiple comparisons. Source data are provided in Supplementary Data 9.

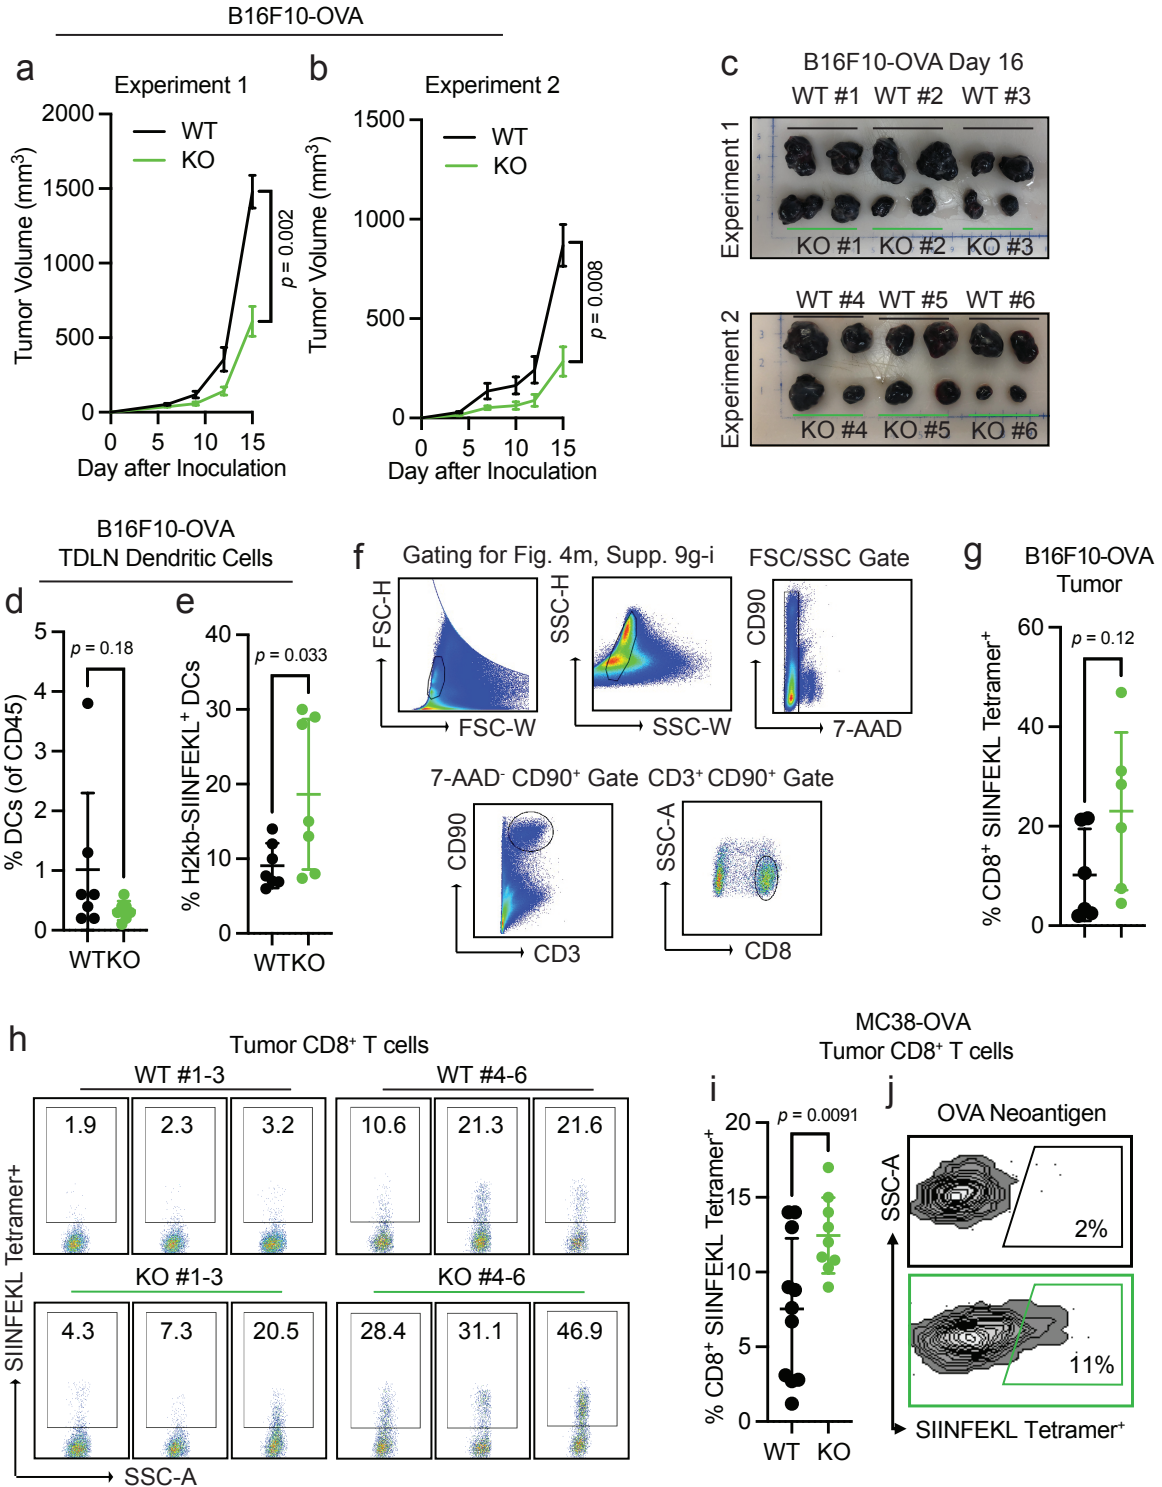

**Supplementary Information 9: Characterization of tumor-associated T cell responses with genetic loss of *Pikfyve* in CD11c<sup>+</sup> cells.** Subcutaneous tumor (a) Experiment 1 and (b) Experiment 2 of B16F10-OVA tumors (mm<sup>3</sup>) in *Pikfyve* KO mice or WT mice. Data plotted are mean  $\pm$  s.e.m. *P* value is determined by Mann-Whitney U

test on Day 15. **(c)** Image of B16F10-OVA tumors on Day 16. Bilateral subcutaneous tumors were excised from 3 WT/KO littermate pairs per experiment in two independent experiments. **(d)** Percent dendritic cells of CD45<sup>+</sup> cells in *Pikfyve* WT ( $n = 6$ ) versus KO ( $n = 6$ ) tumor-draining lymph nodes of B16F10-OVA tumors. Data plotted are mean  $\pm$  s.d.  $P$  value is determined by Mann-Whitney U test. **(e)** Percent H2-kb-SIINFEKL<sup>+</sup> dendritic cells in WT ( $n = 6$ ) versus KO ( $n = 6$ ) tumor-draining lymph nodes of B16F10-OVA tumors. Data plotted are mean  $\pm$  s.d.  $P$  value is determined by Mann-Whitney U test. **(f)** Gating strategy for Fig. 4m, Supp. 9g-i (7-AAD<sup>-</sup> CD90<sup>+</sup> CD3<sup>+</sup> CD8<sup>+</sup> gate for intratumoral CD8<sup>+</sup> T cells). **(g)** Percentage and **(h)** dot plots of SIINFEKL Tetramer<sup>+</sup> CD8<sup>+</sup> T cells isolated from B16F10-OVA tumors. Bilateral subcutaneous tumors from each WT ( $n = 6$ ) or KO ( $n = 6$ ) mouse were combined for analysis. WT/KO littermate pairs #1-3 (Experiment 1) and pairs #4-6 (Experiment 2) are from two independent experiments. Data plotted are mean  $\pm$  s.d.  $P$  value is determined by student t-test with Welch's correction. **(i)** Percentage and **(j)** dot plots of SIINFEKL Tetramer<sup>+</sup> CD8<sup>+</sup> T cells isolated from MC38-OVA WT ( $n = 11$ ) or KO ( $n = 9$ ) tumors. Data plotted are mean  $\pm$  s.d.  $P$  value is determined by student t-test with Welch's correction. All  $P$  values are two-sided. Source data are provided in Supplementary Data 9.

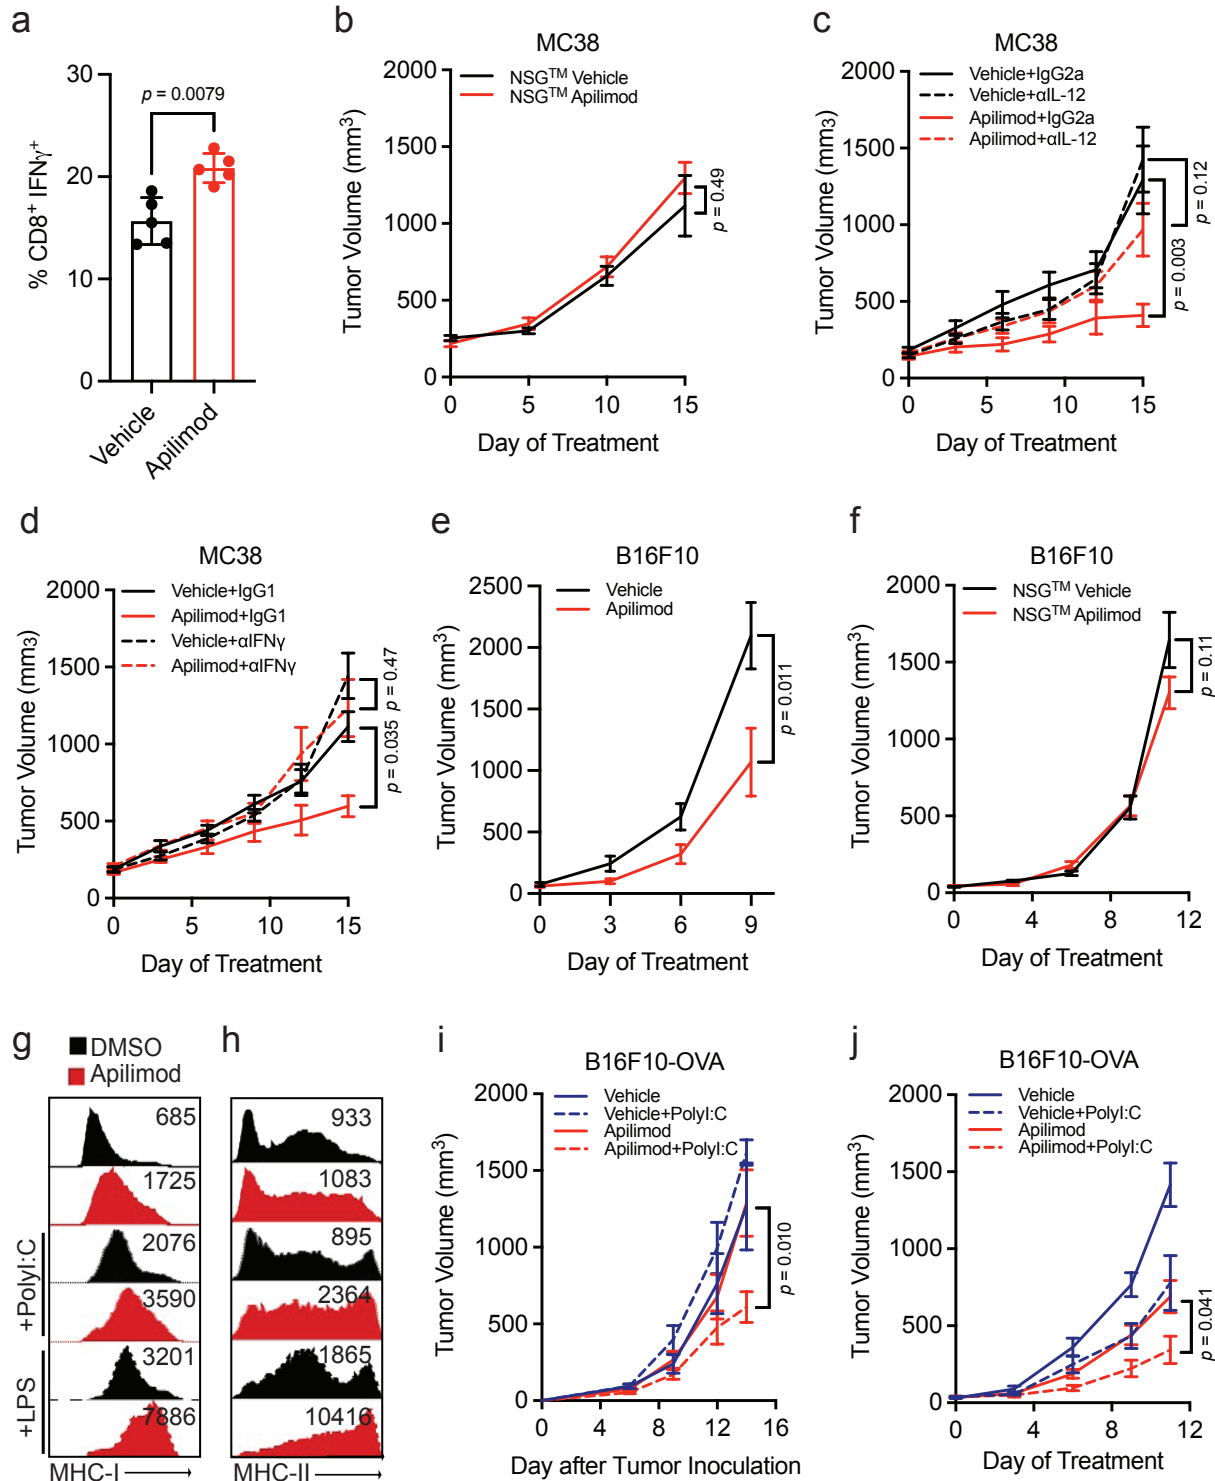

**Supplementary Information 10: PIKfyve inhibitor anti-tumor efficacy with loss of immune signaling pathways.** **a)** Percent IFN $\gamma$ <sup>+</sup> of CD8<sup>+</sup> T cells in vehicle or apilimod-treated MC38 tumors. Bilateral subcutaneous tumors from each vehicle or apilimod-treated ( $n = 5$  per group) mouse were combined for analysis. Data plotted are mean  $\pm$  s.d.  $P$  value is determined by Mann-Whitney U test. **b)** MC38 tumors (mm<sup>3</sup>)



treated with vehicle versus apilimod ( $n = 6$  tumors per group) in NSG<sup>TM</sup> mice. Data plotted are mean  $\pm$  s.e.m.  $P$  value is determined by Mann-Whitney U test on day 15 of treatment. **c)** MC38 tumors ( $\text{mm}^3$ ) in mice treated with vehicle versus apilimod ( $n = 6$  tumors per group) treated with IgG2a or  $\alpha$ IL-12p40 blocking antibody. **d)** MC38 tumors ( $\text{mm}^3$ ) in mice treated with vehicle versus apilimod ( $n = 6$  tumors per group) treated with IgG1 or  $\alpha$ IFN $\gamma$  blocking antibody. Data for **c-d** are plotted are mean  $\pm$  s.e.m. and  $p$  value is determined by ANOVA after post-hoc Tukey adjustment for multiple comparisons on day 15 of treatment. **e)** B16F10 tumors ( $\text{mm}^3$ ) in mice treated with vehicle or apilimod (30 mg/kg daily) ( $n = 10$  tumors per group, Day 9). **f)** B16F10 tumors ( $\text{mm}^3$ ) with vehicle versus apilimod ( $n = 10$  tumors per group, Day 11) in NSG<sup>TM</sup> mice. Data for **e-f** are mean  $\pm$  s.e.m and  $p$  value is determined by Mann Whitney U test. MFI of **(g)** MHC-I (H2-kb, H2-kd) and **(h)** MHC-II (MHC-IA-IE) on DMSO or apilimod-treated cDCs +/- PolyI:C (50  $\mu\text{g/ml}$ ) or LPS (50 ng/ml) treated for 20 hours. Images are representative of two experiments. **i)** B16F10-OVA tumors ( $\text{mm}^3$ ) following 21 days of pre-treatment with vehicle versus apilimod +/- subcutaneous injection of water versus PolyI:C (100 $\mu\text{g}$  on Day 1 and Day 14) ( $n = 8$  tumors per group, assessed to Day 14 after tumor inoculation). **j)** Subcutaneous tumor volume of B16F10-OVA tumors ( $\text{mm}^3$ ) with vehicle or apilimod +/- subcutaneous injection of water versus PolyI:C (100 $\mu\text{g}$  once weekly) ( $n = 6$  tumors per group, assessed to Day 11 of treatment). Data plotted are mean  $\pm$  s.e.m.  $P$  value is determined by Mann-Whitney U test. All  $P$  values are two-sided. Source data are provided in Supplementary Data 9.

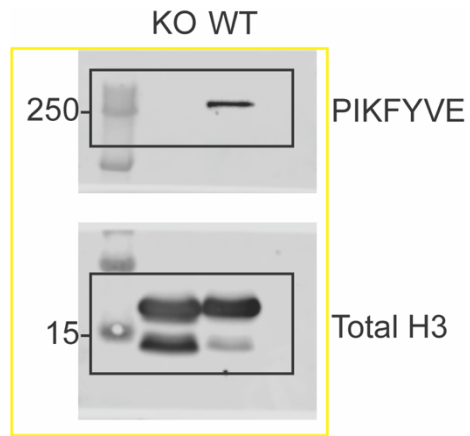

**Supplementary Information 11: Source data for immunoblot in Supp 3c.** Black box shows where image was cropped for the figure panel. Yellow box represents blots run on the same gel.
