# Supplementary material for: PIKfyve, expressed by CD11c-positive cells, controls tumor immunity
Source: PubMed Central journal article supplement (PMC11213953; doi:10.1038/s41467-024-48931-9), 2024-06-28
Supplement: 41467_2024_48931_MOESM3_ESM.pdf [file 41467_2024_48931_MOESM3_ESM.pdf]

## **Description of Additional Supplementary Files**

File Name: Supplementary Data 1

Description: Differentially expressed genes in PIKfyve KO versus WT cDCs

File Name: Supplementary Data 2

Description: MSigDB curated genesets ("C2") PIKfyve KO versus WT cDCs

File Name: Supplementary Data 3

Description: MSigDB Hallmark genesets ("H") PIKfyve KO versus WT cDCs

File Name: Supplementary Data 4

Description: Validated NF- $\kappa$ B downstream gene targets

File Name: Supplementary Data 5

Description: Differentially expressed genes in Apilimod versus DMSO-treated cDCs at 3 hours post-treatment

File Name: Supplementary Data 6

Description: Differentially expressed genes in Apilimod versus DMSO-treated cDCs at 8 hours post-treatment

File Name: Supplementary Data 7

Description: MSigDB Hallmark genesets ("H") Apilimod versus DMSO-treated cDCs at 3 hours post-treatment

File Name: Supplementary Data 8

Description: MSigDB Hallmark genesets ("H") Apilimod versus DMSO-treated cDCs at 8 hours post-treatment

File Name: Supplementary Data 9

Description: Statistical Source Data for Supplementary Figures 1-10
